# Supplementary material for: Impact of atomistic or crystallographic descriptors for classification of gold nanoparticles
Source: Royal Society of Chemistry journal article supplement (doi:10.1039/d1nr02258j), 2021-01-01
Supplement: d1nr02258j1.pdf [file d1nr02258j1.pdf]

## SUPPORTING INFORMATION

# Impact of Atomistic or Crystallographic Descriptors for Classification of Gold Nanoparticles

Haonan Zhang<sup>1</sup> and Amanda S. Barnard<sup>\*1</sup>

<sup>1</sup>*School of Computing, Australian National University, Acton ACT 2601, Australia*

The document contains the algorithms for iterative label spreading (ILS) (Algorithm 1), the Tukey method (Algorithm 2) and the linear correlation removal procedure (Algorithm 3). This is followed by the t-SNE maps of the distribution of clusters, and the corresponding minimum distance plot from ILS, for results using *k*-Means (Figures S1 and S2) and DBSCAN (Figures S3 and S4); then the results of the classification (learning curves and classification reports) obtained using the random forest classifier (Figure S5, Table S1) and logistic regression (Figure S6, Table S2). Finally a list of features in the atomic descriptor (Table S3) and crystallographic descriptor (Table S4) are provided. The correlations between the features for both the atomic and crystallographic descriptors are shown in Figure S6 and described in detail in Reference 2. The method used for the original data generation is included at the end, and is described in detail in References 4 to 10.

---

<sup>\*</sup>Corresponding author: amanda.s.barnard@anu.edu.au

---

**Algorithm 1** Iterative Label Spreading

---

**Require:** Original dataset  $X = \{x_1, x_2, \dots, x_m\}, x_i \in R^n$ ;

**Ensure:** The List of distance  $D$ ; The indexes of distance order  $L$

- 1: Initialize two empty lists  $L$  and  $D$
  - 2: Randomly choose a point from  $X$  into  $L$ , add 0 to  $D$  and remove it from  $X$
  - 3: **repeat**
  - 4:     Compute the all distance between labeled points and unlabeled points
  - 5:     Move the nearest unlabeled point to labeled points to  $L$ , add the distance to  $D$  and remove it from  $X$
  - 6: **until**  $X$  is empty
- 

---

**Algorithm 2** Tukey method

---

**Require:** Original dataset  $D = \{x_1, x_2, \dots, x_m\}, x_i \in R^n$ ; The set of original features  $F$ ; The tolerance of outliers  $n$

**Ensure:** The set of the outliers index  $O_i$

- 1: Initialize  $I$  as a empty set
  - 2: **for** each  $f \in F$  **do**
  - 3:      $Q_1$  is the first quartile of  $D[f]$ ;
  - 4:      $Q_3$  is the third quartile of  $D[f]$ ;
  - 5:      $R_o$  is the range of outlier:  $R_o = 1.5 * (Q_3 - Q_1)$ ;
  - 6:     The outliers' index for feature  $f$ ,  $I_f$  is where  $D[f] < Q_1 - R_o$  or  $D[f] > Q_3 + R_o$ ;
  - 7:     Append  $I_f$  in  $I$
  - 8: **end for**
  - 9: Count the frequency of indexes in  $O_i$ . If the frequency  $> n$ , append this index in  $O_i$
- 

---

**Algorithm 3** Remove linear correlation

---

**Require:** Original dataset  $D = \{x_1, x_2, \dots, x_m\}, x_i \in R^n$ ;

**Ensure:** A nonlinear correlation dataset  $\hat{D}$

- 1: Initialize  $\hat{D}$  as a empty set
  - 2: **for** each  $x \in D$  **do**
  - 3:     Append  $x$  into  $\hat{D}$ ;
  - 4:     Compute the rank  $r$  of  $\hat{D}$ ;
  - 5:     **if then**  $r < \text{the number of features in } \hat{D}$  or all entries in  $x$  are zero
  - 6:         Pop  $x$  from  $\hat{D}$
  - 7:     **end if**
  - 8: **end for**
-

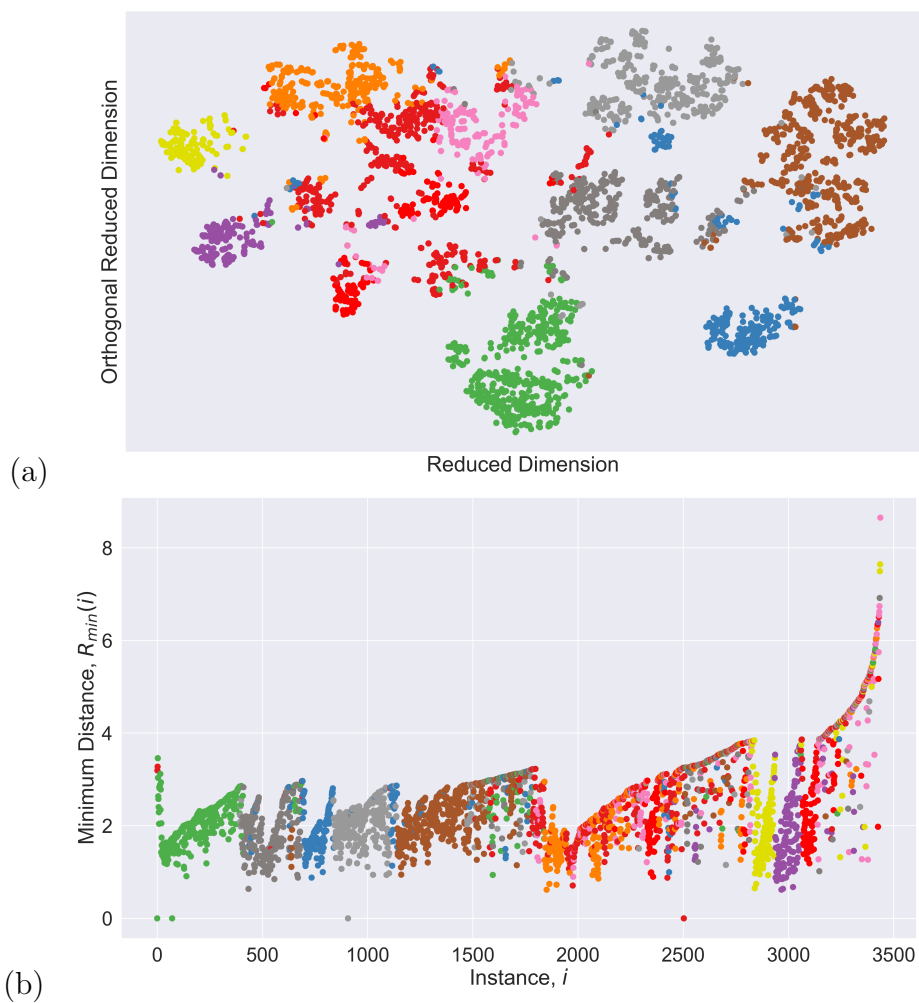

Figure S1: Results of  $k$ -Means clustering with the atomic descriptor, showing (a) the distributions of the clusters visualised with t-SNE, and (b) the minimum distance plot from ILS showing 11 clusters, and coloured by the  $k$ -Means cluster assignments.

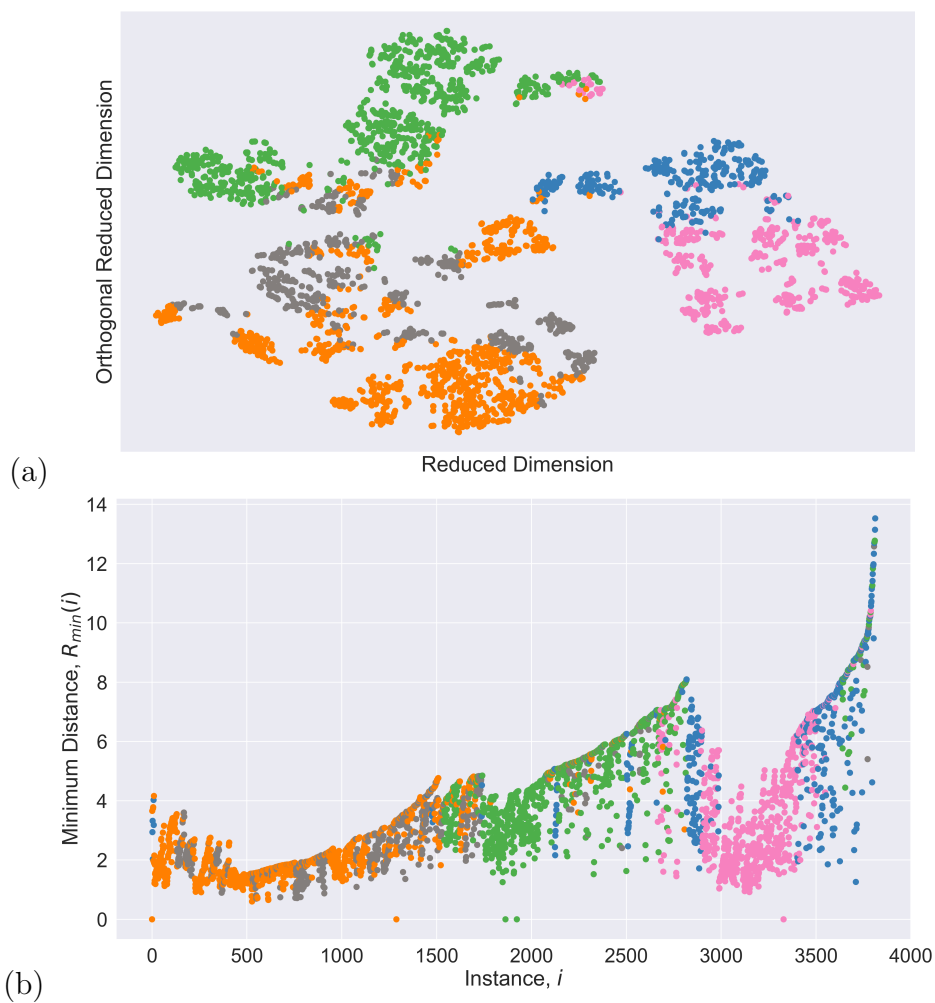

Figure S2: Results of  $k$ -Means clustering with the crystallographic descriptor, showing (a) the distributions of the clusters visualised with t-SNE, and (b) the minimum distance plot from ILS showing 11 clusters, and coloured by the  $k$ -Means cluster assignments.

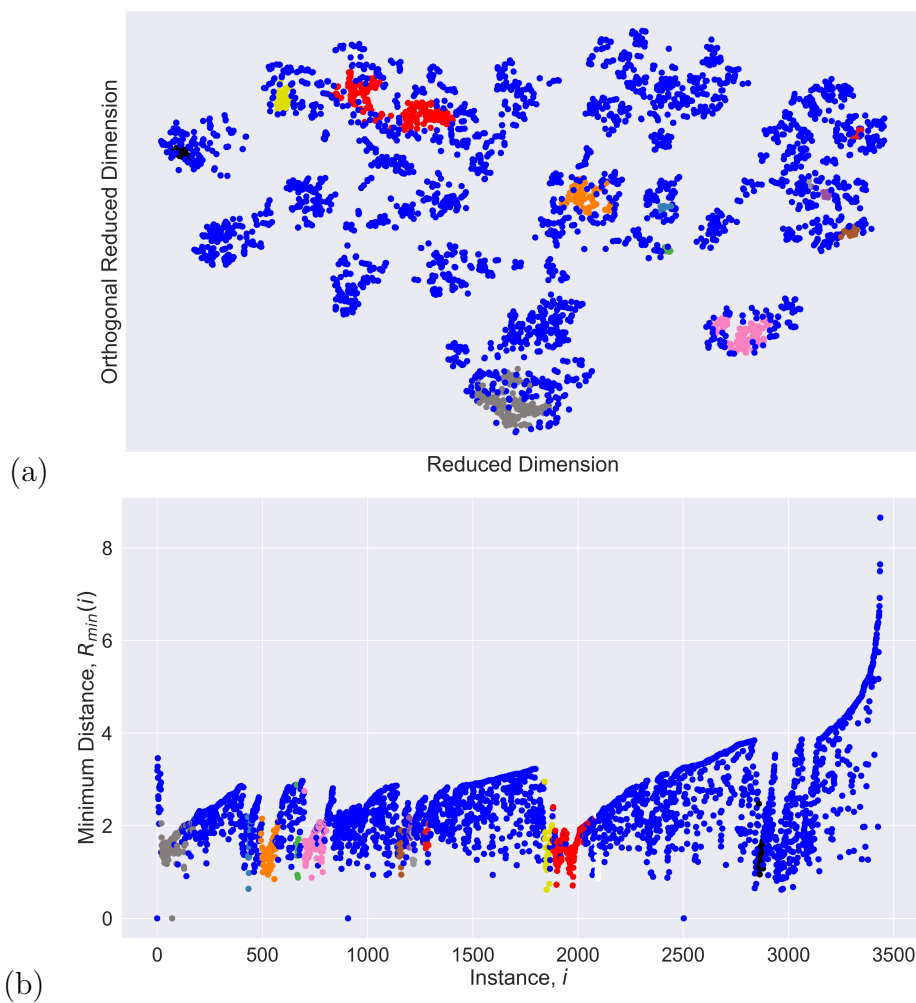

Figure S3: Results of DBSCAN clustering with the atomic descriptor, showing (a) the distributions of the clusters visualised with t-SNE, and (b) the minimum distance plot from ILS showing 11 clusters, and coloured by the DBSCAN cluster assignments.

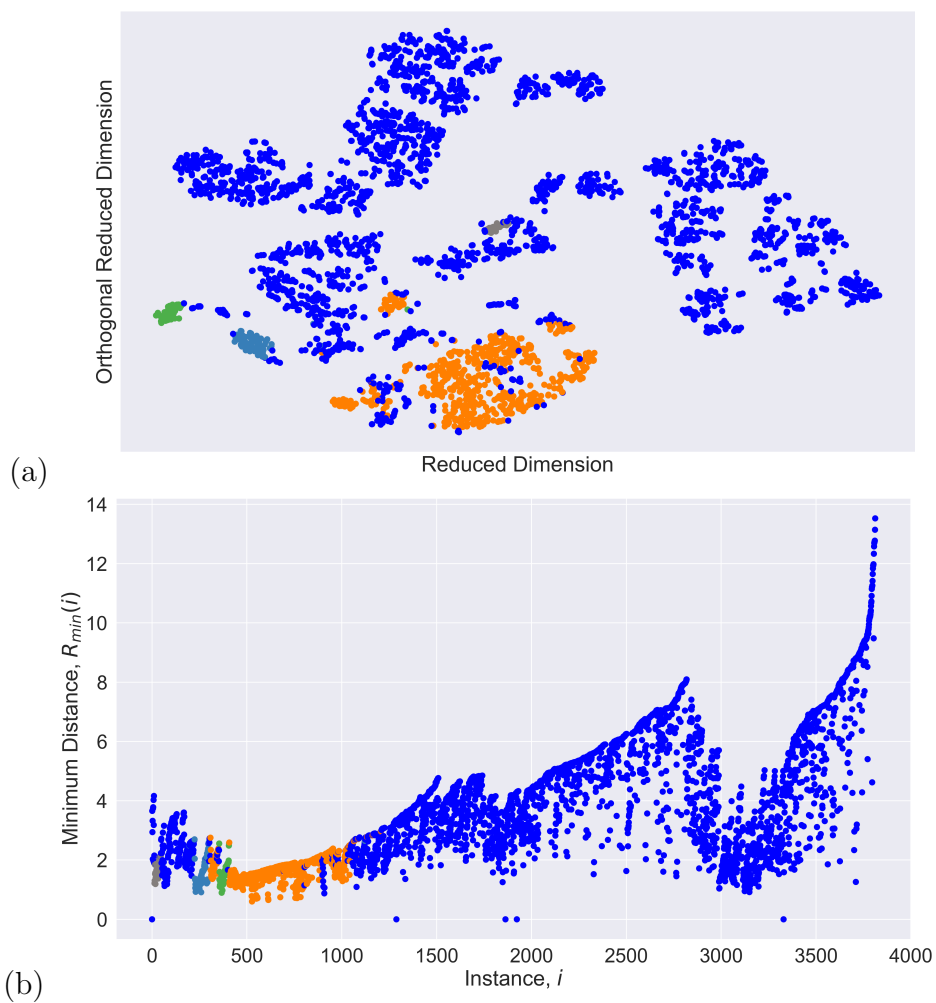

Figure S4: Results of DBSCAN clustering with the crystallographic descriptor, showing (a) the distributions of the clusters visualised with t-SNE, and (b) the minimum distance plot from ILS showing 11 clusters, and coloured by the DBSCAN cluster assignments.

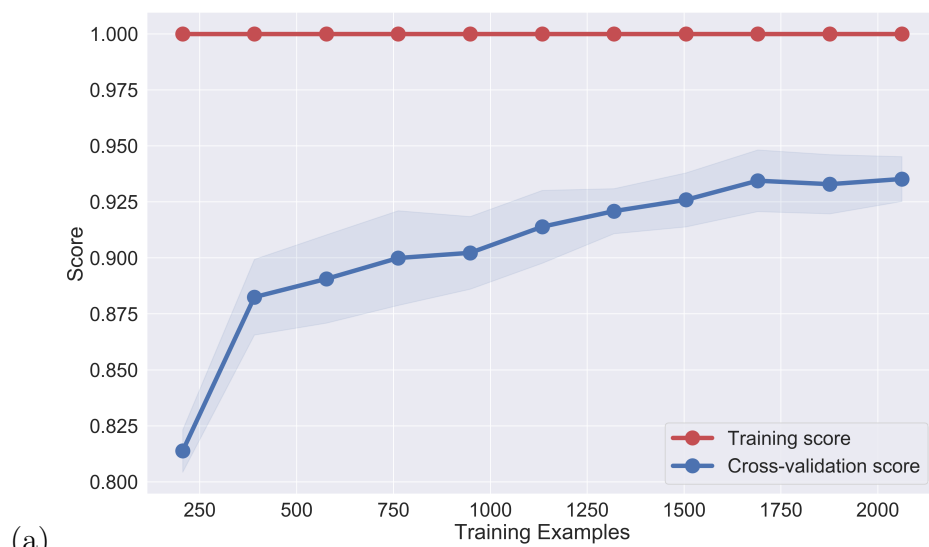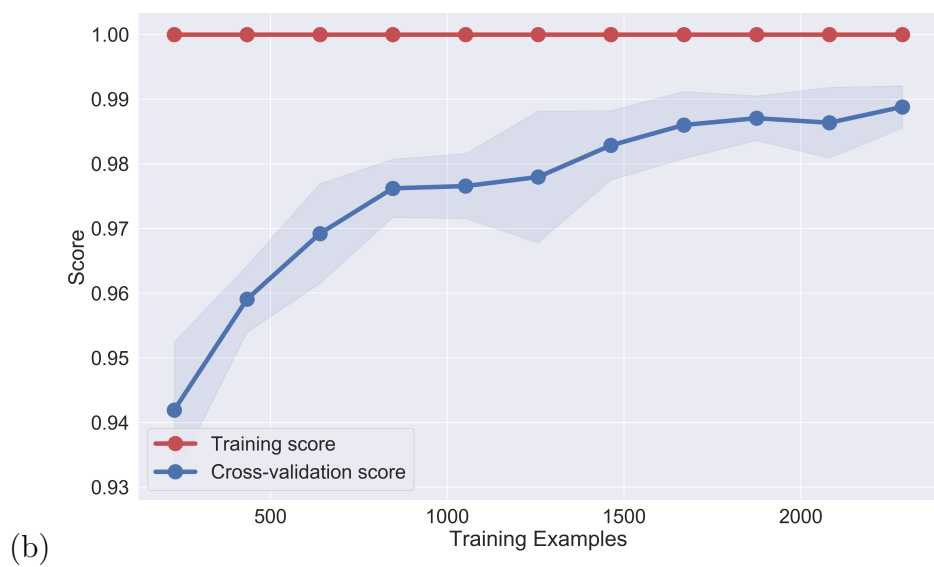

Figure S5: Results for the random forest classifier for (a) the atomic descriptor, and (b) the crystallographic descriptor, with labels obtained from the agglomerative clustering.

Table S1: Classification reports for the atomic and crystallographic descriptors from the random forest classifier using labels from agglomerative clustering.

| Atomic Descriptor |           |        |          | Crystallographic Descriptor |           |        |          |
|-------------------|-----------|--------|----------|-----------------------------|-----------|--------|----------|
| Class             | Precision | Recall | F1-score | Class                       | Precision | Recall | F1-score |
| Class 1           | 0.91      | 0.93   | 0.92     | Class 1                     | 1.00      | 1.00   | 1.00     |
| Class 2           | 1.00      | 1.00   | 1.00     | Class 2                     | 0.99      | 0.94   | 0.96     |
| Class 3           | 0.94      | 0.92   | 0.93     | Class 3                     | 0.99      | 0.97   | 0.98     |
| Class 4           | 0.96      | 0.97   | 0.97     | Class 4                     | 0.97      | 0.99   | 0.98     |
| Class 5           | 0.98      | 0.98   | 0.98     | Class 5                     | 0.93      | 0.97   | 0.95     |
| Class 6           | 0.98      | 1.00   | 0.99     |                             |           |        |          |
| Class 7           | 0.96      | 0.98   | 0.97     |                             |           |        |          |
| Class 8           | 0.89      | 0.95   | 0.92     |                             |           |        |          |
| Class 9           | 1.00      | 0.86   | 0.92     |                             |           |        |          |
| Class 10          | 0.96      | 0.96   | 0.96     |                             |           |        |          |
| Class 11          | 0.90      | 0.84   | 0.87     |                             |           |        |          |

Table S2: Classification reports for the atomic and crystallographic descriptors from the logistic regression classifier using labels from agglomerative clustering.

| Atomic Descriptor |           |        |          | Crystallographic Descriptor |           |        |          |
|-------------------|-----------|--------|----------|-----------------------------|-----------|--------|----------|
| Class             | Precision | Recall | F1-score | Class                       | Precision | Recall | F1-score |
| Class 1           | 0.36      | 0.29   | 0.32     | Class 1                     | 0.92      | 0.93   | v0.93    |
| Class 2           | 0.27      | 0.09   | 0.13     | Class 2                     | 0.77      | 0.64   | 0.70     |
| Class 3           | 0.31      | 0.27   | 0.29     | Class 3                     | 0.74      | 0.87   | 0.80     |
| Class 4           | 0.30      | 0.29   | 0.30     | Class 4                     | 0.82      | 0.89   | 0.85     |
| Class 5           | 0.49      | 0.78   | 0.60     | Class 5                     | 0.55      | 0.34   | 0.42     |
| Class 6           | 0.00      | 0.00   | 0.00     |                             |           |        |          |
| Class 7           | 0.45      | 0.46   | 0.46     |                             |           |        |          |
| Class 8           | 0.29      | 0.52   | 0.37     |                             |           |        |          |
| Class 9           | 0.00      | 0.00   | 0.00     |                             |           |        |          |
| Class 10          | 0.71      | 0.71   | 0.71     |                             |           |        |          |
| Class 11          | 0.45      | 0.49   | 0.47     |                             |           |        |          |

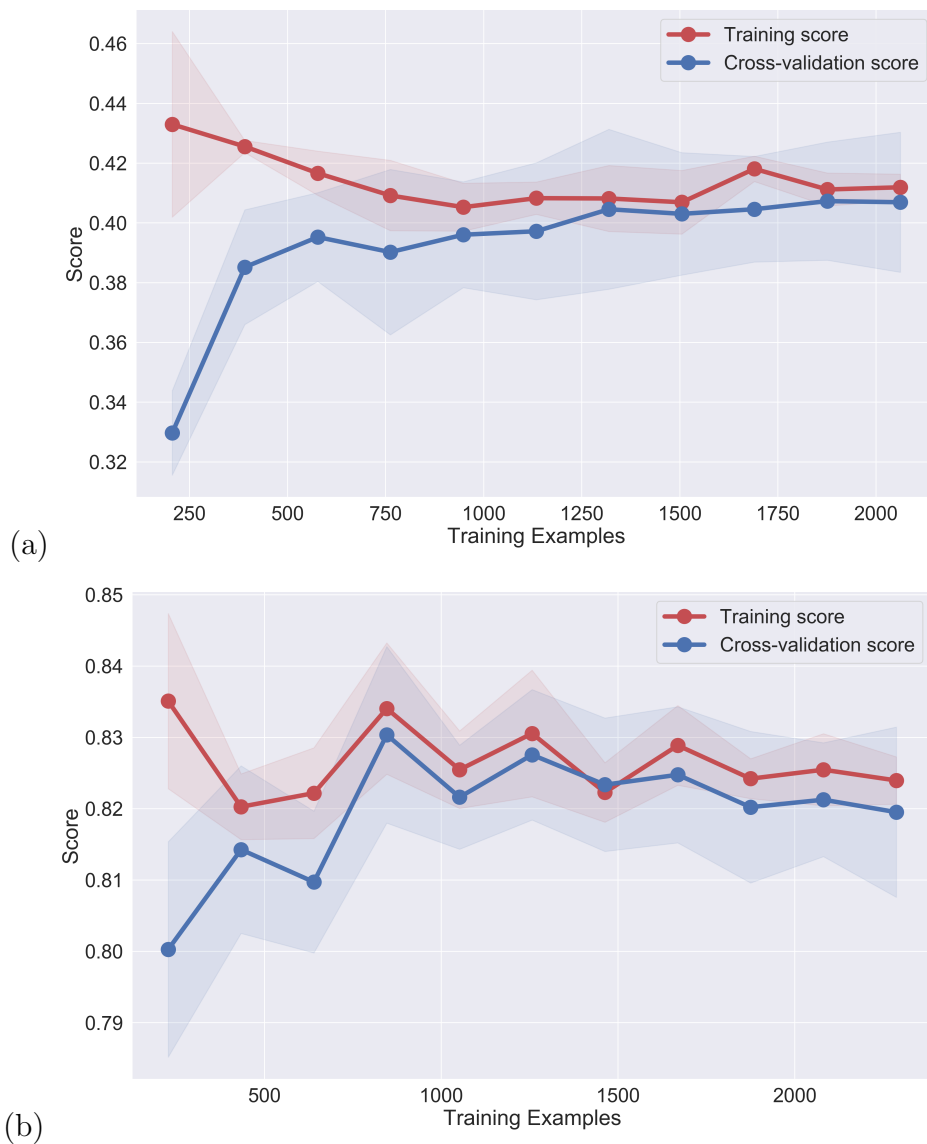

Figure S6: Results for the logistic regression classifier for (a) the atomic descriptor, and (b) the crystallographic descriptor, with labels obtained from the agglomerative clustering. Note that the reduction in the training score with respect to the number of training instances is due to the complicity of the training set increasing with size, but the complexity of the regression remaining unchanged, results in a minor increase in under-fitting.

Table S3: List of Features in the Atomic Descriptor

| Feature          | Description                                                                 |
|------------------|-----------------------------------------------------------------------------|
| ID               | Unique identifier, filename ID.xyz                                          |
| Au_bulk          | Fraction of bulk atoms                                                      |
| Au_surface       | Fraction of surface atoms                                                   |
| R_min            | Nanoparticle radius minimum, Å                                              |
| R_max            | Nanoparticle radius maximum, Å                                              |
| R_diff           | Nanoparticle radius minimum, Å                                              |
| R_avg            | Nanoparticle radius average, Å                                              |
| R_std            | Nanoparticle radius standard deviation, Å                                   |
| R_skew           | Nanoparticle radius skewness, Å                                             |
| R_kurt           | Nanoparticle radius kurtosis, Å                                             |
| S_100            | Fraction of atoms located on (100) surfaces                                 |
| S_111            | Fraction of atoms located on (111) surfaces                                 |
| S_110            | Fraction of atoms located on (110) surfaces                                 |
| S_311            | Fraction of atoms located on (311) surfaces                                 |
| Au_coord_total   | Order parameters, Average coordination number of all atoms                  |
| Au_bulk_coord    | Coordination statistics, Average coordination number of all bulk atoms      |
| Au_surface_coord | Coordination statistics, Average coordination number of all surface atoms   |
| TCN_1            | Coordination statistics, Fraction of atoms with coordination number 1       |
| TCN_2            | Coordination statistics, Fraction of atoms with coordination number 2       |
| TCN_3            | Coordination statistics, Fraction of atoms with coordination number 3       |
| TCN_4            | Coordination statistics, Fraction of atoms with coordination number 4       |
| TCN_5            | Coordination statistics, Fraction of atoms with coordination number 5       |
| TCN_6            | Coordination statistics, Fraction of atoms with coordination number 6       |
| TCN_7            | Coordination statistics, Fraction of atoms with coordination number 7       |
| TCN_8            | Coordination statistics, Fraction of atoms with coordination number 8       |
| TCN_9            | Coordination statistics, Fraction of atoms with coordination number 9       |
| TCN_10           | Coordination statistics, Fraction of atoms with coordination number 10      |
| TCN_11           | Coordination statistics, Fraction of atoms with coordination number 11      |
| TCN_12           | Coordination statistics, Fraction of atoms with coordination number 12      |
| TCN_13           | Coordination statistics, Fraction of atoms with coordination number 13      |
| TCN_14           | Coordination statistics, Fraction of atoms with coordination number 14      |
| TCN_15           | Coordination statistics, Fraction of atoms with coordination number 15      |
| TCN_16           | Coordination statistics, Fraction of atoms with coordination number 16      |
| BCN_1            | Coordination statistics, Fraction of bulk atoms with coordination number 1  |
| BCN_2            | Coordination statistics, Fraction of bulk atoms with coordination number 2  |
| BCN_3            | Coordination statistics, Fraction of bulk atoms with coordination number 3  |
| BCN_4            | Coordination statistics, Fraction of bulk atoms with coordination number 4  |
| BCN_5            | Coordination statistics, Fraction of bulk atoms with coordination number 5  |
| BCN_6            | Coordination statistics, Fraction of bulk atoms with coordination number 6  |
| BCN_7            | Coordination statistics, Fraction of bulk atoms with coordination number 7  |
| BCN_8            | Coordination statistics, Fraction of bulk atoms with coordination number 8  |
| BCN_9            | Coordination statistics, Fraction of bulk atoms with coordination number 9  |
| BCN_10           | Coordination statistics, Fraction of bulk atoms with coordination number 10 |
| BCN_11           | Coordination statistics, Fraction of bulk atoms with coordination number 11 |
| BCN_12           | Coordination statistics, Fraction of bulk atoms with coordination number 12 |
| BCN_13           | Coordination statistics, Fraction of bulk atoms with coordination number 13 |

Continued on next page

| Feature | Description                                                                    |
|---------|--------------------------------------------------------------------------------|
| BCN_14  | Coordination statistics, Fraction of bulk atoms with coordination number 14    |
| BCN_15  | Coordination statistics, Fraction of bulk atoms with coordination number 15    |
| BCN_16  | Coordination statistics, Fraction of bulk atoms with coordination number 16    |
| SCN_1   | Coordination statistics, Fraction of surface atoms with coordination number 1  |
| SCN_2   | Coordination statistics, Fraction of surface atoms with coordination number 2  |
| SCN_3   | Coordination statistics, Fraction of surface atoms with coordination number 3  |
| SCN_4   | Coordination statistics, Fraction of surface atoms with coordination number 4  |
| SCN_5   | Coordination statistics, Fraction of surface atoms with coordination number 5  |
| SCN_6   | Coordination statistics, Fraction of surface atoms with coordination number 6  |
| SCN_7   | Coordination statistics, Fraction of surface atoms with coordination number 7  |
| SCN_8   | Coordination statistics, Fraction of surface atoms with coordination number 8  |
| SCN_9   | Coordination statistics, Fraction of surface atoms with coordination number 9  |
| SCN_10  | Coordination statistics, Fraction of surface atoms with coordination number 10 |
| SCN_11  | Coordination statistics, Fraction of surface atoms with coordination number 11 |
| SCN_12  | Coordination statistics, Fraction of surface atoms with coordination number 12 |
| SCN_13  | Coordination statistics, Fraction of surface atoms with coordination number 13 |
| SCN_14  | Coordination statistics, Fraction of surface atoms with coordination number 14 |
| SCN_15  | Coordination statistics, Fraction of surface atoms with coordination number 15 |
| SCN_16  | Coordination statistics, Fraction of surface atoms with coordination number 16 |

Table S4: List of Features used in the Crystallographic Descriptor

| Feature         | Description                                                                         |
|-----------------|-------------------------------------------------------------------------------------|
| ID              | Unique identifier, filename ID.xyz                                                  |
| Au_bulk         | Fraction of bulk atoms                                                              |
| Au_surface      | Fraction of surface atoms                                                           |
| R_min           | Nanoparticle radius minimum, Å                                                      |
| R_max           | Nanoparticle radius maximum, Å                                                      |
| R_avg           | Nanoparticle radius average, Å                                                      |
| R_std           | Nanoparticle radius standard deviation, Å                                           |
| R_skew          | Nanoparticle radius skewness, Å                                                     |
| R_kurt          | Nanoparticle radius kurtosis, Å                                                     |
| Au-Au_bonds     | Bonding statistics, Average bond length, Å                                          |
| Au-Au_stddev    | Bonding statistics, Standard Deviation of the bond length, Å                        |
| Au-Au-Au_angle  | Bonding statistics, Average bond angle, Degrees                                     |
| Au-Au-Au_stddev | Bonding statistics, Standard deviation of the bond angle, Degrees                   |
| FCC             | Lattice statistics, Fraction of atoms in face centred cubic (fcc) lattice           |
| HCP             | Lattice statistics, Fraction of atoms in hexagonal closed packed (hcp) lattice      |
| ICOS            | Lattice statistics, Fraction of atoms in icosahedral lattice                        |
| DECA            | Lattice statistics, Fraction of atoms in decahedral lattice                         |
| q6q6_total      | Order parameters, Average spherical harmonic (q6.q6 >0.7) for all atoms             |
| q6q6_bulk       | Order parameters, Average spherical harmonic (q6.q6 >0.7) for all bulk atoms        |
| q6q6_surf       | Order parameters, Average spherical harmonic (q6.q6 >0.7) for all surface atoms     |
| q6q6_T0         | Order parameters, Fraction of atoms with spherical harmonic (q6.q6 >0.7) of 0       |
| q6q6_T1         | Order parameters, Fraction of atoms with spherical harmonic (q6.q6 >0.7) of 1       |
| q6q6_T2         | Order parameters, Fraction of atoms with spherical harmonic (q6.q6 >0.7) of 2       |
| q6q6_T3         | Order parameters, Fraction of atoms with spherical harmonic (q6.q6 >0.7) of 3       |
| q6q6_T4         | Order parameters, Fraction of atoms with spherical harmonic (q6.q6 >0.7) of 4       |
| q6q6_T5         | Order parameters, Fraction of atoms with spherical harmonic (q6.q6 >0.7) of 5       |
| q6q6_T6         | Order parameters, Fraction of atoms with spherical harmonic (q6.q6 >0.7) of 6       |
| q6q6_T7         | Order parameters, Fraction of atoms with spherical harmonic (q6.q6 >0.7) of 7       |
| q6q6_T8         | Order parameters, Fraction of atoms with spherical harmonic (q6.q6 >0.7) of 8       |
| q6q6_T9         | Order parameters, Fraction of atoms with spherical harmonic (q6.q6 >0.7) of 9       |
| q6q6_T10        | Order parameters, Fraction of atoms with spherical harmonic (q6.q6 >0.7) of 10      |
| q6q6_T11        | Order parameters, Fraction of atoms with spherical harmonic (q6.q6 >0.7) of 11      |
| q6q6_T12        | Order parameters, Fraction of atoms with spherical harmonic (q6.q6 >0.7) of 12      |
| q6q6_T13        | Order parameters, Fraction of atoms with spherical harmonic (q6.q6 >0.7) of 13      |
| q6q6_T14        | Order parameters, Fraction of atoms with spherical harmonic (q6.q6 >0.7) of 14      |
| q6q6_B0         | Order parameters, Fraction of bulk atoms with spherical harmonic (q6.q6 >0.7) of 0  |
| q6q6_B1         | Order parameters, Fraction of bulk atoms with spherical harmonic (q6.q6 >0.7) of 1  |
| q6q6_B2         | Order parameters, Fraction of bulk atoms with spherical harmonic (q6.q6 >0.7) of 2  |
| q6q6_B3         | Order parameters, Fraction of bulk atoms with spherical harmonic (q6.q6 >0.7) of 3  |
| q6q6_B4         | Order parameters, Fraction of bulk atoms with spherical harmonic (q6.q6 >0.7) of 4  |
| q6q6_B5         | Order parameters, Fraction of bulk atoms with spherical harmonic (q6.q6 >0.7) of 5  |
| q6q6_B6         | Order parameters, Fraction of bulk atoms with spherical harmonic (q6.q6 >0.7) of 6  |
| q6q6_B7         | Order parameters, Fraction of bulk atoms with spherical harmonic (q6.q6 >0.7) of 7  |
| q6q6_B8         | Order parameters, Fraction of bulk atoms with spherical harmonic (q6.q6 >0.7) of 8  |
| q6q6_B9         | Order parameters, Fraction of bulk atoms with spherical harmonic (q6.q6 >0.7) of 9  |
| q6q6_B10        | Order parameters, Fraction of bulk atoms with spherical harmonic (q6.q6 >0.7) of 10 |

Continued on next page

| Feature  | Description                                                                            |
|----------|----------------------------------------------------------------------------------------|
| q6q6_B11 | Order parameters, Fraction of bulk atoms with spherical harmonic (q6.q6 >0.7) of 11    |
| q6q6_B12 | Order parameters, Fraction of bulk atoms with spherical harmonic (q6.q6 >0.7) of 12    |
| q6q6_B13 | Order parameters, Fraction of bulk atoms with spherical harmonic (q6.q6 >0.7) of 13    |
| q6q6_B14 | Order parameters, Fraction of bulk atoms with spherical harmonic (q6.q6 >0.7) of 14    |
| q6q6_S0  | Order parameters, Fraction of surface atoms with spherical harmonic (q6.q6 >0.7) of 0  |
| q6q6_S1  | Order parameters, Fraction of surface atoms with spherical harmonic (q6.q6 >0.7) of 1  |
| q6q6_S2  | Order parameters, Fraction of surface atoms with spherical harmonic (q6.q6 >0.7) of 2  |
| q6q6_S3  | Order parameters, Fraction of surface atoms with spherical harmonic (q6.q6 >0.7) of 3  |
| q6q6_S4  | Order parameters, Fraction of surface atoms with spherical harmonic (q6.q6 >0.7) of 4  |
| q6q6_S5  | Order parameters, Fraction of surface atoms with spherical harmonic (q6.q6 >0.7) of 5  |
| q6q6_S6  | Order parameters, Fraction of surface atoms with spherical harmonic (q6.q6 >0.7) of 6  |
| q6q6_S7  | Order parameters, Fraction of surface atoms with spherical harmonic (q6.q6 >0.7) of 7  |
| q6q6_S8  | Order parameters, Fraction of surface atoms with spherical harmonic (q6.q6 >0.7) of 8  |
| q6q6_S9  | Order parameters, Fraction of surface atoms with spherical harmonic (q6.q6 >0.7) of 9  |
| q6q6_S10 | Order parameters, Fraction of surface atoms with spherical harmonic (q6.q6 >0.7) of 10 |
| q6q6_S11 | Order parameters, Fraction of surface atoms with spherical harmonic (q6.q6 >0.7) of 11 |
| q6q6_S12 | Order parameters, Fraction of surface atoms with spherical harmonic (q6.q6 >0.7) of 12 |
| q6q6_S13 | Order parameters, Fraction of surface atoms with spherical harmonic (q6.q6 >0.7) of 13 |
| q6q6_S14 | Order parameters, Fraction of surface atoms with spherical harmonic (q6.q6 >0.7) of 14 |

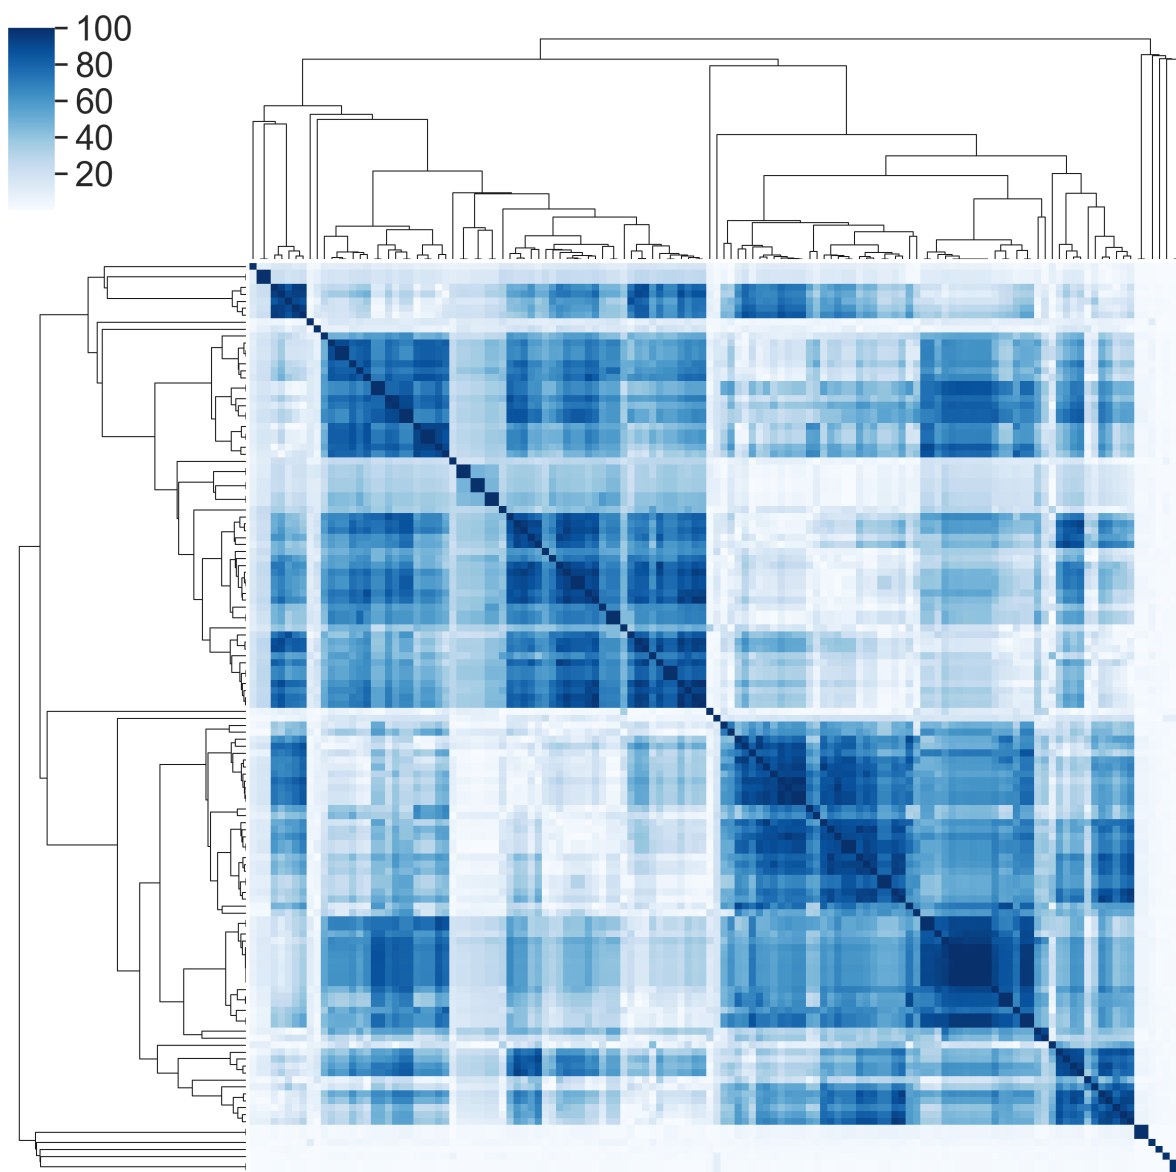

Figure S7: Correlation matrix for the entire (combined) feature space provided with Reference [1], and describe in detail in Reference [2], showing minimal correlations between the features of the atomic and crystallographic descriptors.

# Original Data Generation

As mentioned in the main text, the data used in this study was not generated as part of this study. Originally these nanoparticles were generated using a combination of traditional molecular dynamics (MD) simulations and simple statistical data processing, to ensure the samples are physically realistic, thermodynamically stable and characteristic of nanoparticles observed experimentally, but guaranteed to be structurally unique.

The MD simulations of the growth process were originally performed by using the LAMMPS code [3], using embedded atom method (EAM) to accurately describe Au–Au atomic interactions. Under this scheme the total electronic density in a metal is approximated by a linear superposition of contributions from individual atoms, so the electron density in the vicinity of each atom can be expressed as the sum of the contributions given by the atom in question, plus the electron density of all neighboring atoms. In this way, for a system consisting of  $n$  atoms, the expression to calculate the energy could be written as:

$$U_{tot} = \sum_i^n G_i(\rho_i) + \frac{1}{2} \sum_{i=1}^n \sum_{j=1 \neq i}^n \phi_{ij}(R_{ij}) \quad (1)$$

where the first term is the embedded energy and the second term represent short-range pair potential.  $G_i(\rho_i)$  represents the energy needed to embed an atom  $i$  in an electronic density given by  $(\rho)$ .  $(\rho_i)$  is the electronic density pattern in atom  $i$  due to all the other atoms in the system and is defined as follows

$$\rho_i = \sum_{j=1 \neq i}^n \rho_j^a(R_{ij}), \quad (2)$$

where  $\rho_j^a$  is the atomic electronic density with spherical distribution, contributed by the atom  $j$ . The last term in equation 1,  $\phi_{ij}$ , represents the pair electrostatic interaction between ionic cores and is calculated using the Coulomb law,

$$\phi_{ij} = \frac{1}{4\pi\epsilon_0} \frac{Q_i(r)Q_j(r)}{r_{ij}} \quad (3)$$

where  $Q$  represents the effective charge.

In their raw form trajectories from MD simulations are not suitable for statistical analysis or machine learning, since structures from temporally adjacent time-steps may or may not be significantly different (such as those occupying a local minima before a transition state barrier could be breached). Failure to eliminate redundant structures, or those that are statistically indistinguishable based on their energy or coordinate geometries, can result in an over representation of certain types of structures which are an artefact of the simulation and not meaningful. For this reason it is important to process the data to extract structures from the trajectory when they become statistically different from the previous extraction. During this process unbound atoms, smaller clusters or nanoparticles formed *via* secondary nucleation may also be removed, to restrict the ensemble to primary nanoparticles at each extraction point. This simulated a kinetically-limited formation process. In addition to this a set of ideal polyhedron a a variety of sizes was relaxed at a set of finite temperatures to simulate a thermodynamically-limited formation process, and the data sets combined. In this way an ensemble is created that is suitable for informatics. This technique has been used to generate data sets of other metallic nanoparticles as well [5, 4, 6, 7, 8, 9, 10].

## References

- [1] A. Barnard, G. Opletal, *Gold Nanoparticle Data Set, v1*, CSIRO Data Collection, **2019**, <https://doi.org/10.25919/5d395ef9a4291>
- [2] Barnard, A. S.; Opletal, G. Selecting Machine Learning Models for Metallic Nanoparticles. *Nano Futures* 2020, **4**, 035003–035014.
- [3] <http://lammps.sandia.gov>.
- [4] A.J. Parker, B. Motevalli, G. Opletal, A. S. Barnard, The pure and representative types of disordered platinum nanoparticles from machine learning. *Nanotech.* 2021, **32**, 095404.
- [5] A. S. Barnard, G. Opletal, Selecting machine learning models for metallic nanoparticles. *Nano Futures* 2020, **4**, 035003
- [6] A. J. Parker, G. Opletal, A.S. Barnard, Classification of platinum nanoparticle catalysts using machine learning. *J. Appl. Phys.* 2020, **128**, 014301.
- [7] B. Sun, H. Barron, G. Opletal, A. S. Barnard, From process to properties: Correlating synthesis conditions and structural disorder of platinum nanocatalysts. *J. Phys. Chem. C*, 2018, **122**, 28085–28093
- [8] B. Sun, H. Barron, B. Wells, G. Opletal, A.S. Barnard, Correlating anisotropy and disorder with the surface structure of platinum nanoparticles. *Nanoscale*, 2018, **10** 20393–20404
- [9] H. Barron, G. Opletal, R.D. Tilley, A.S. Barnard, Predicting the role seed morphology in the evolution of anisotropic nanocatalysts. *Nanoscale*, 2017, **9**, 1502–1510
- [10] H. Barron, G. Opletal, R.D. Tilley, A.S. Barnard, Dynamic evolution of specific catalytic sites on Pt nanoparticles. *Catal. Sci. Technol.* 2016, **6**, 144–151
